# Supplementary material for: Charge Self‐Regulation of Metallic Heterostructure Ni2P@Co9S8 for Alkaline Water Electrolysis with Ultralow Overpotential at Large Current Density
Source: PubMed Central journal article supplement (PMC10667855; doi:10.1002/advs.202303682), 2023-10-22
Supplement: ADVS-10-2303682-s001.pdf [file ADVS-10-2303682-s001.pdf]

## Supporting Information

for *Adv. Sci.*, DOI 10.1002/adv.202303682

Charge Self-Regulation of Metallic Heterostructure Ni<sub>2</sub>P@Co<sub>9</sub>S<sub>8</sub> for Alkaline Water Electrolysis with Ultralow Overpotential at Large Current Density

*Xingxing Zhu, Xue Yao, Xingyou Lang, Jie Liu, Chandra-Veer Singh\*, Erhong Song\*, Yongfu Zhu\* and Qing Jiang\**

# Supporting Information

*for*

## **Charge Self-regulation of Metallic Heterostructure Ni<sub>2</sub>P@Co<sub>9</sub>S<sub>8</sub> for Alkaline Water Electrolysis with Ultralow Overpotential at Large Current Density**

*Xingxing Zhu<sup>#</sup>, Xue Yao<sup>#</sup>, Xingyou Lang, Jie Liu, Chandra-Veer Singh\*, Erhong Song\*, Yongfu Zhu\*, Qing Jiang\**

X. Zhu, Prof. X. Lang, Prof. Y. Zhu, Prof. Q. Jiang

Key Laboratory of Automobile Materials, Ministry of Education, School of Materials Science and Engineering, Jilin University, Changchun 130022, China

E-mail: yfzhu@jlu.edu.cn

E-mail: jiangq@jlu.edu.cn

Prof. J. Liu, Prof. E. Song

State Key Lab of High Performance Ceramics and Superfine Microstructure, Shanghai Institute of Ceramics, Chinese Academy of Sciences, Shanghai, 200050, China

Prof. E. Song

Center of Materials Science and Optoelectronics Engineering, University of Chinese Academy of Sciences, Beijing, 100049, China

E-mail: ehsong@mail.sic.ac.cn;

Dr. X. Yao, Prof. C.-V. Singh

Department of Materials Science and Engineering, University of Toronto, Toronto, ON M5S 3E4, Canada

Email: [chandraveer.singh@utoronto.ca](mailto:chandraveer.singh@utoronto.ca)

Prof. C.-V. Singh

Department of Mechanical and Industrial Engineering, University of Toronto, Toronto,

ON M5S 3G8, Canada

#These authors contributed equally

\*Corresponding authors

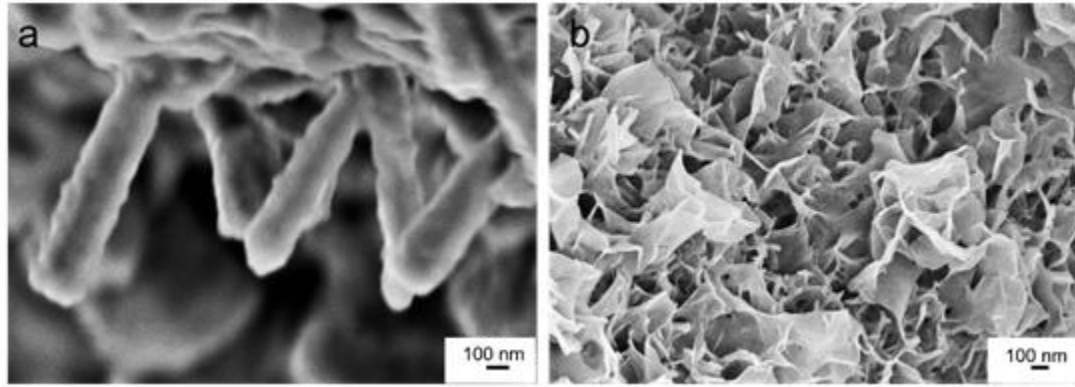

**Figure S1** FESEM observation of (a) Ni<sub>2</sub>P and (b) Co<sub>9</sub>S<sub>8</sub>.

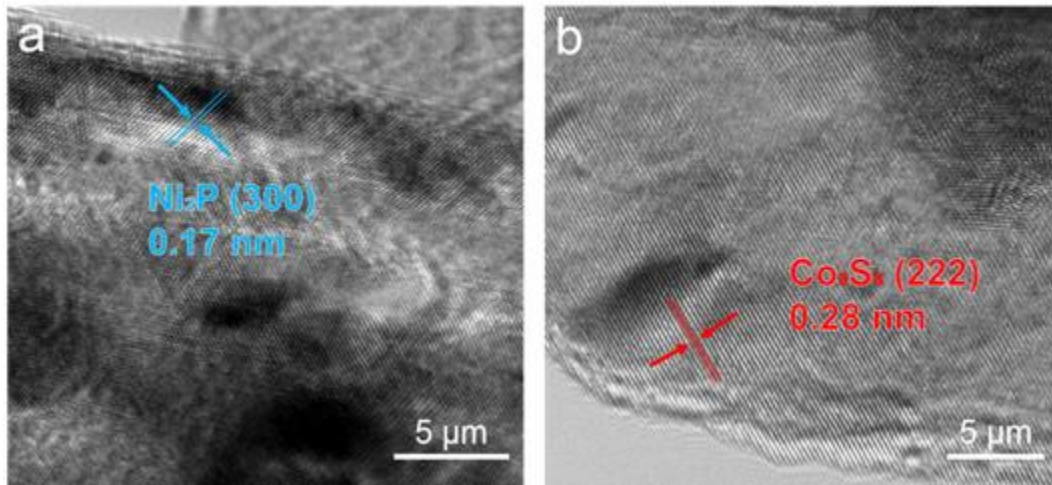

**Figure S2** HR-TEM observation of (a) Ni<sub>2</sub>P and (b) Co<sub>9</sub>S<sub>8</sub>.

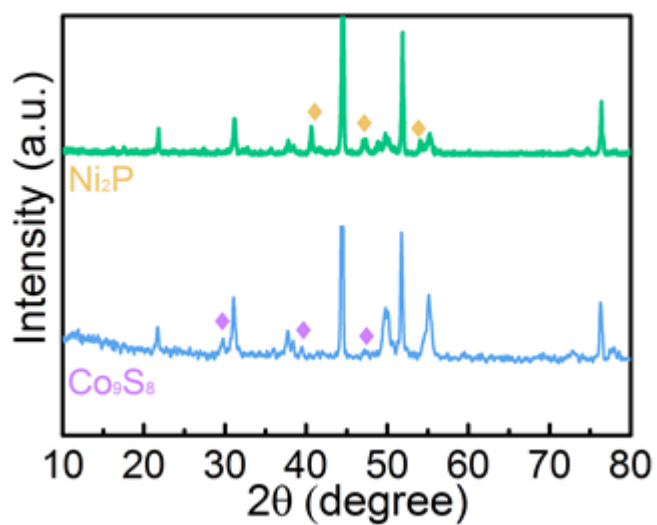

**Figure S3** XRD patterns of Ni<sub>2</sub>P and Co<sub>9</sub>S<sub>8</sub>.

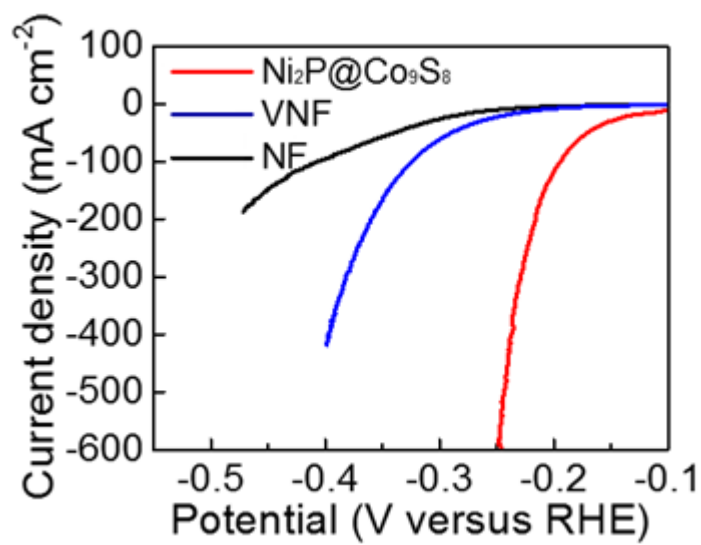

**Figure S4** LSV curves of Ni<sub>2</sub>P@Co<sub>9</sub>S<sub>8</sub>, VNF and NF for HER.

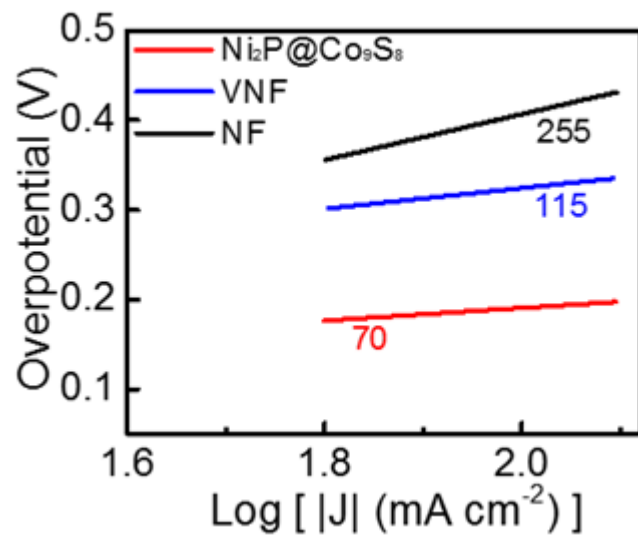

**Figure S5** Tafel slopes of Ni<sub>2</sub>P@Co<sub>9</sub>S<sub>8</sub>, VNF and NF for HER.

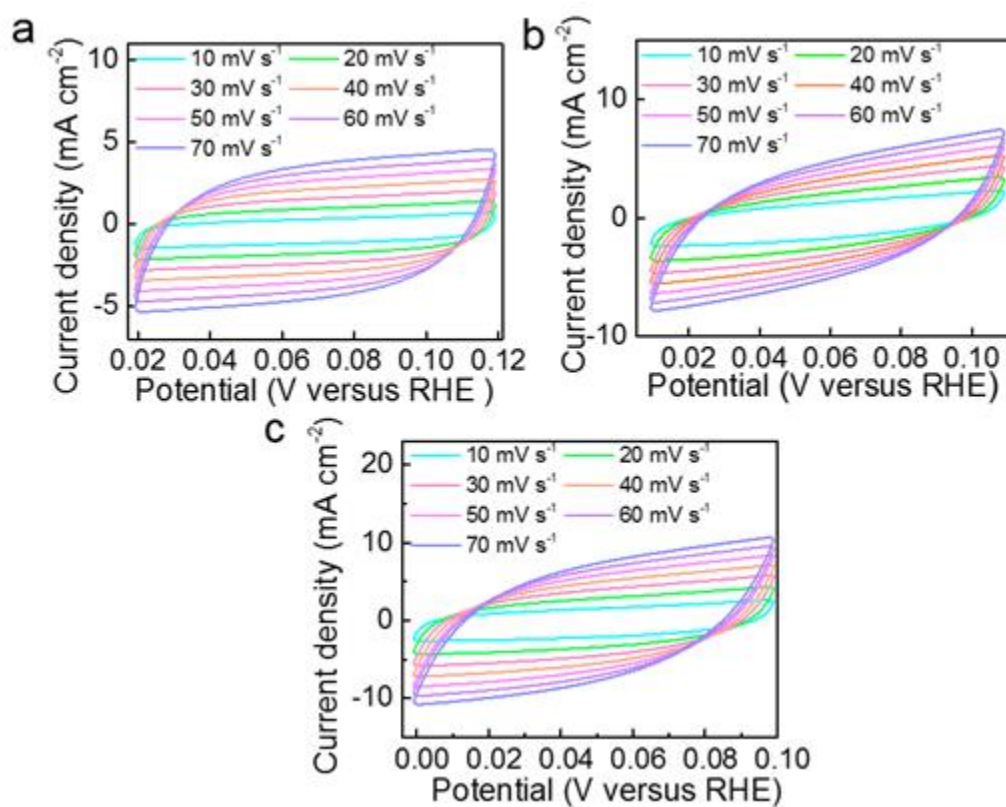

**Figure S6** CV curves of (a) Ni<sub>2</sub>P, (b) Co<sub>9</sub>S<sub>8</sub> and (c) Ni<sub>2</sub>P@Co<sub>9</sub>S<sub>8</sub> for HER.

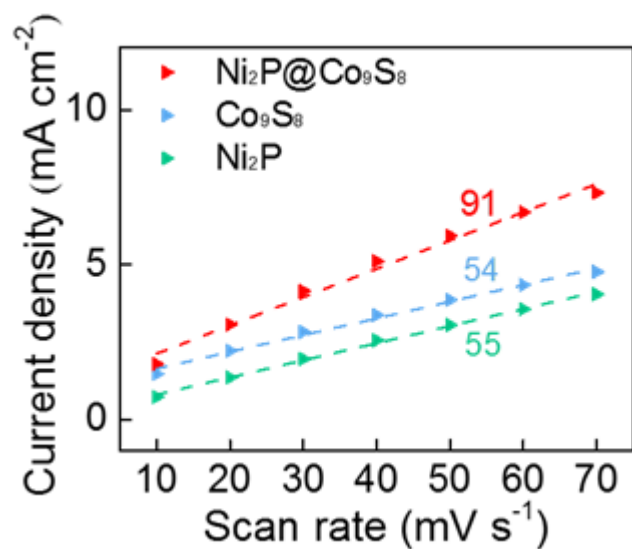

**Figure S7** Plots used to evaluate the double-layer capacitances of Ni<sub>2</sub>P, Co<sub>9</sub>S<sub>8</sub> and Ni<sub>2</sub>P@Co<sub>9</sub>S<sub>8</sub> for HER.

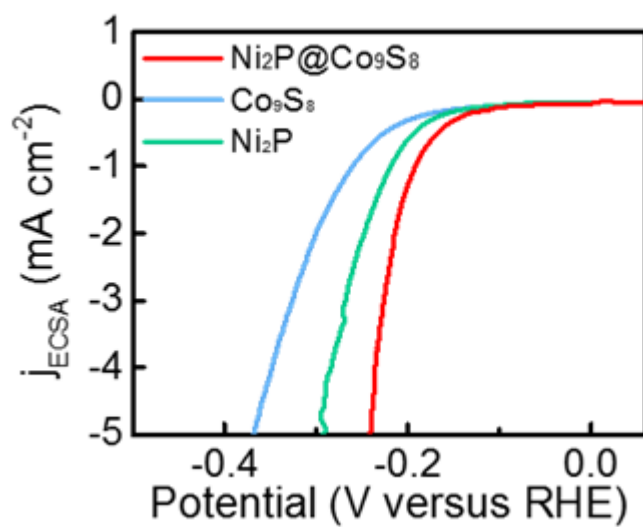

**Figure S8** Polarization curves with the current density normalized to ECSA of Ni<sub>2</sub>P, Co<sub>9</sub>S<sub>8</sub> and Ni<sub>2</sub>P@Co<sub>9</sub>S<sub>8</sub> for HER.

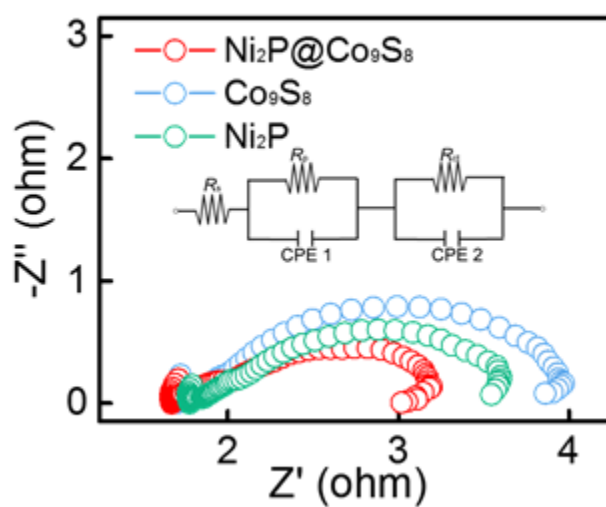

**Figure S9** Nyquist plots of Ni<sub>2</sub>P, Co<sub>9</sub>S<sub>8</sub> and Ni<sub>2</sub>P@Co<sub>9</sub>S<sub>8</sub> for HER.

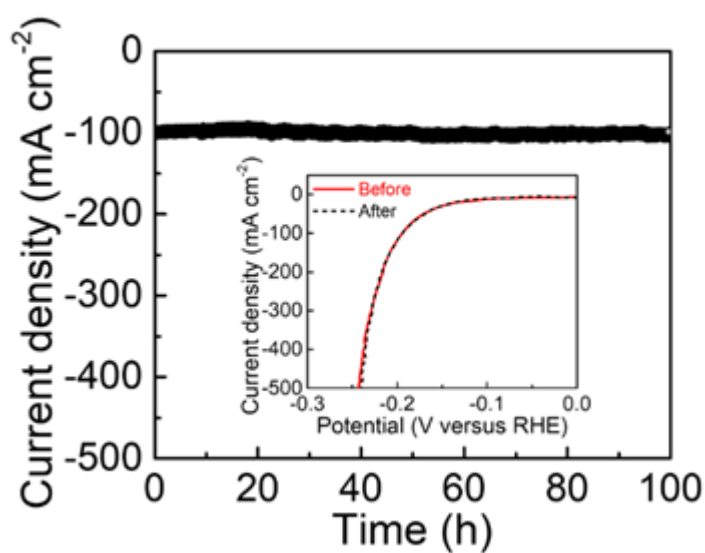

**Figure S10** The long-time current density vs time curve (*i-t* curve) of Ni<sub>2</sub>P@Co<sub>9</sub>S<sub>8</sub> at the potential of -0.188 V versus RHE, and the inset shows the polarization data for Ni<sub>2</sub>P@Co<sub>9</sub>S<sub>8</sub> before and after 100 h.



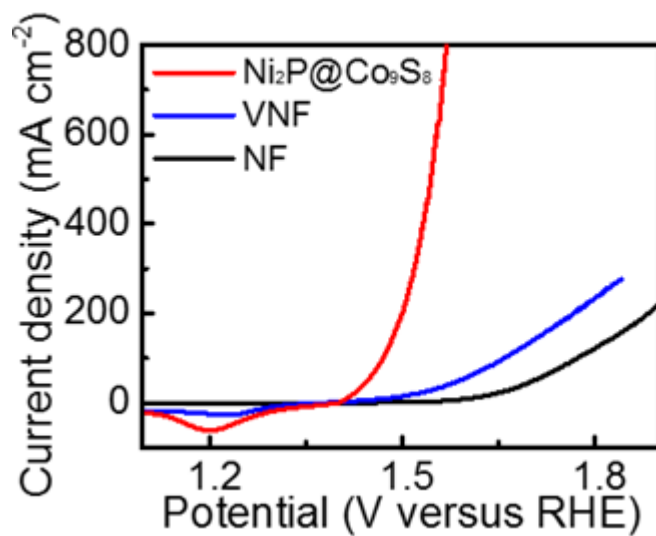

**Figure S11** Polarization curves of  $\text{Ni}_2\text{P}@Co_9S_8$ , VNF and NF for OER.

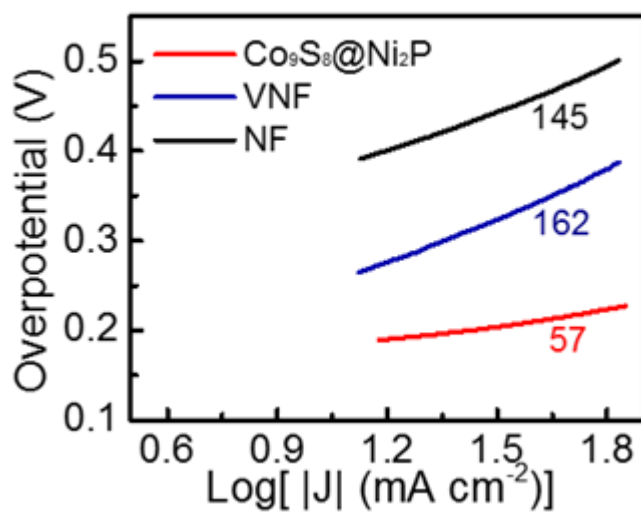

**Figure S12** Tafel slopes of  $\text{Ni}_2\text{P}@Co_9S_8$ , VNF and NF for OER.

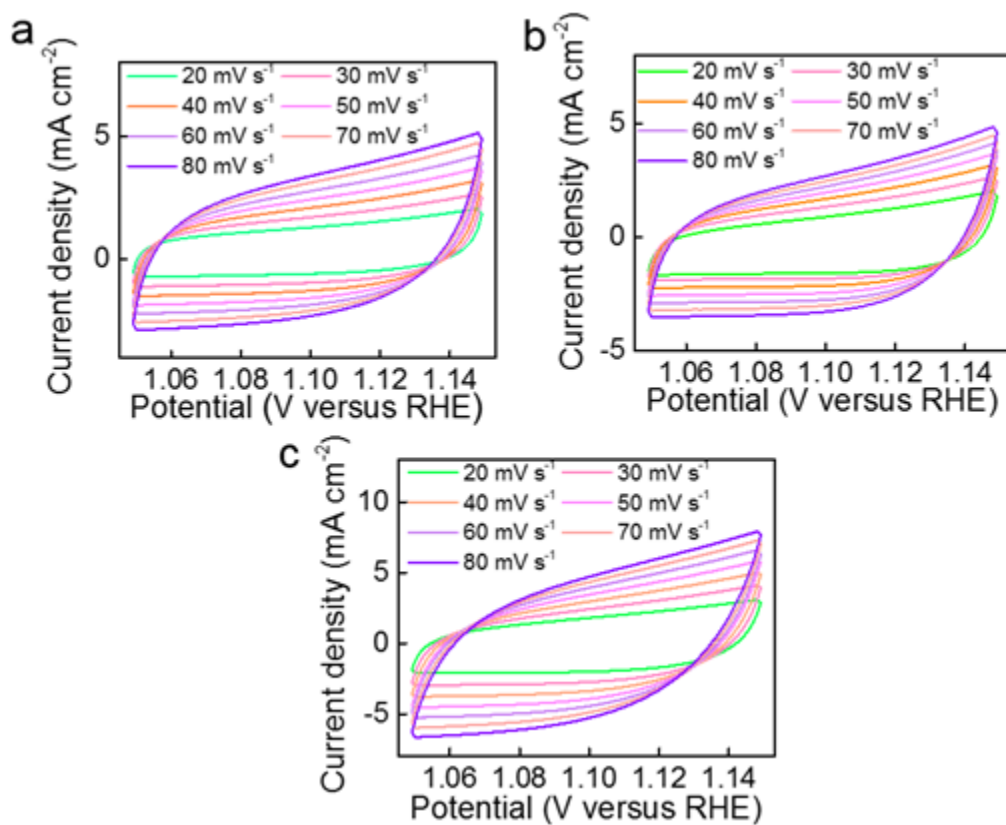

**Figure S13** CV curves of (a) Ni<sub>2</sub>P, (b) Co<sub>9</sub>S<sub>8</sub> and (c) Ni<sub>2</sub>P@Co<sub>9</sub>S<sub>8</sub> for OER.

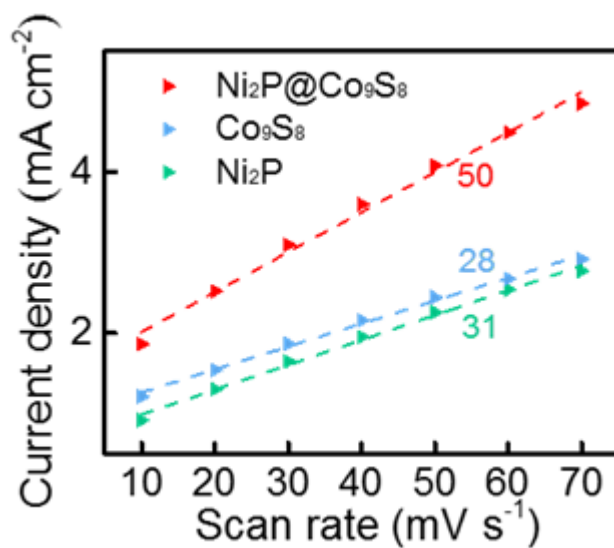

**Figure S14** Plots used to evaluate the double-layer capacitances of Ni<sub>2</sub>P, Co<sub>9</sub>S<sub>8</sub> and Ni<sub>2</sub>P@Co<sub>9</sub>S<sub>8</sub> for OER.

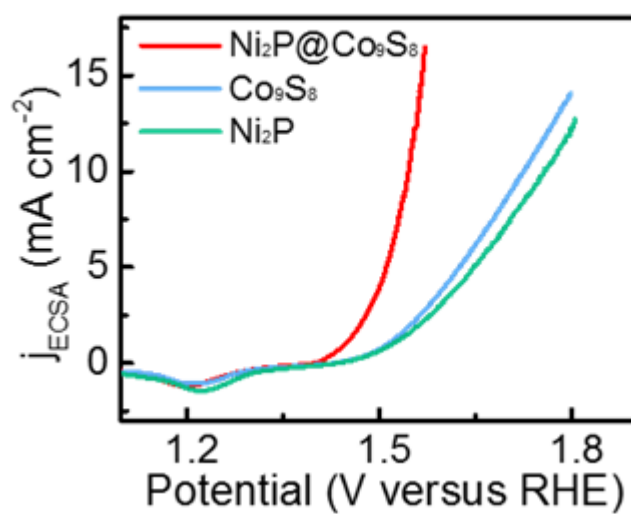

**Figure S15** Polarization curves with the current density normalized to ECSA of Ni<sub>2</sub>P, Co<sub>9</sub>S<sub>8</sub> and Ni<sub>2</sub>P@Co<sub>9</sub>S<sub>8</sub> for OER.

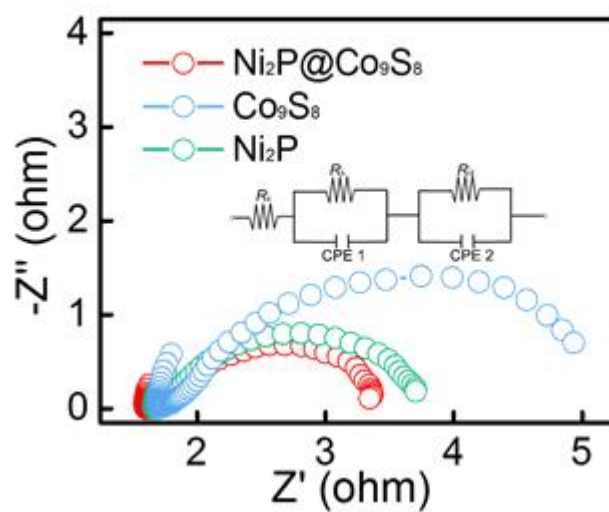

**Figure S16** Nyquist plots of Ni<sub>2</sub>P, Co<sub>9</sub>S<sub>8</sub> and Ni<sub>2</sub>P@Co<sub>9</sub>S<sub>8</sub> for OER.

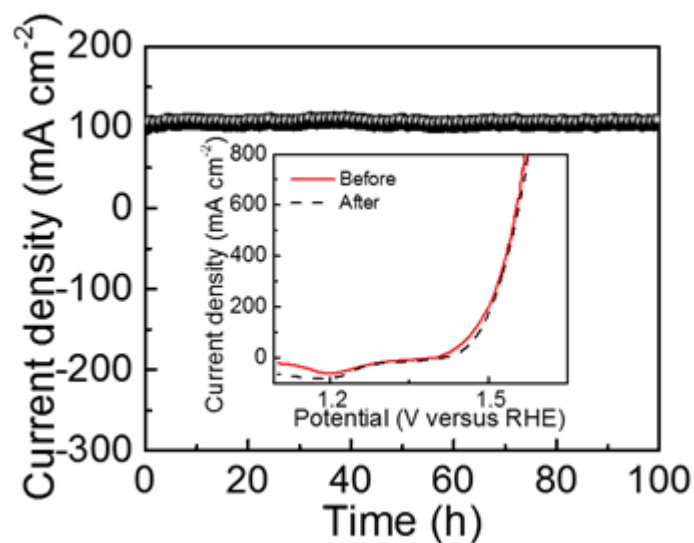

**Figure S17** The  $i$ - $t$  curve of  $\text{Ni}_2\text{P}@Co_9\text{S}_8$  at the potential of 1.485 V versus RHE, and the inset shows the polarization data for  $\text{Ni}_2\text{P}@Co_9\text{S}_8$  before and after 100 h.

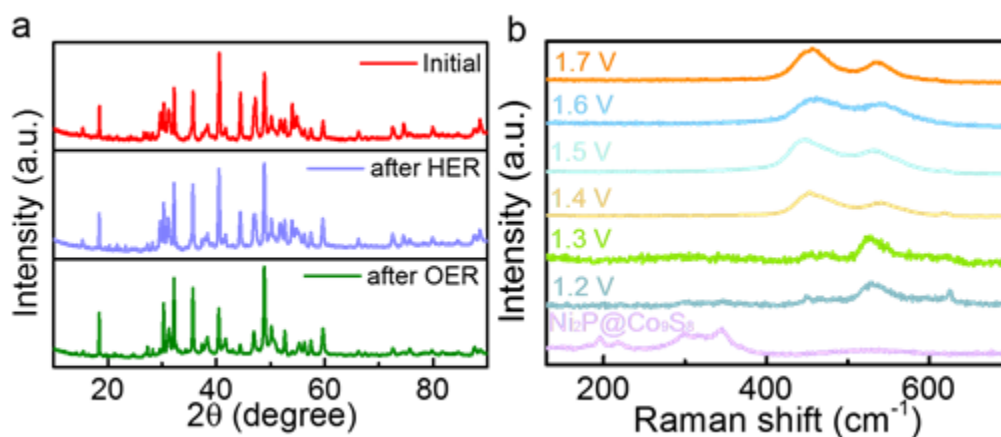

**Figure S18** (a) XRD patterns of  $\text{Ni}_2\text{P}@Co_9\text{S}_8$  before and after HER and OER reactions; (b) In situ Raman spectra of OER on  $\text{Ni}_2\text{P}@Co_9\text{S}_8$  in 1 M KOH.

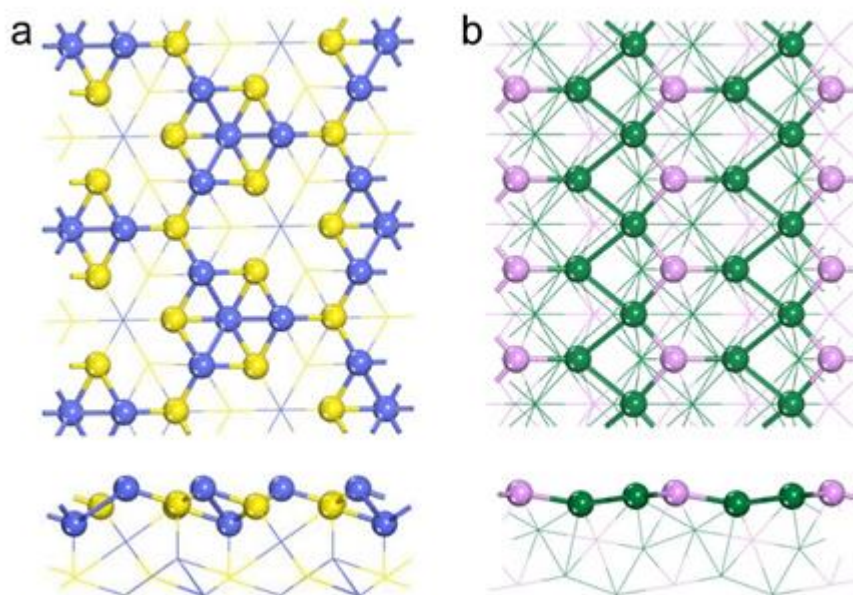

**Figure S19** Optimized structures of (a) Co<sub>9</sub>S<sub>8</sub>(111) and (b) Ni<sub>2</sub>P(100). The top layers are displayed in the ball-stick style while others are in the line style.

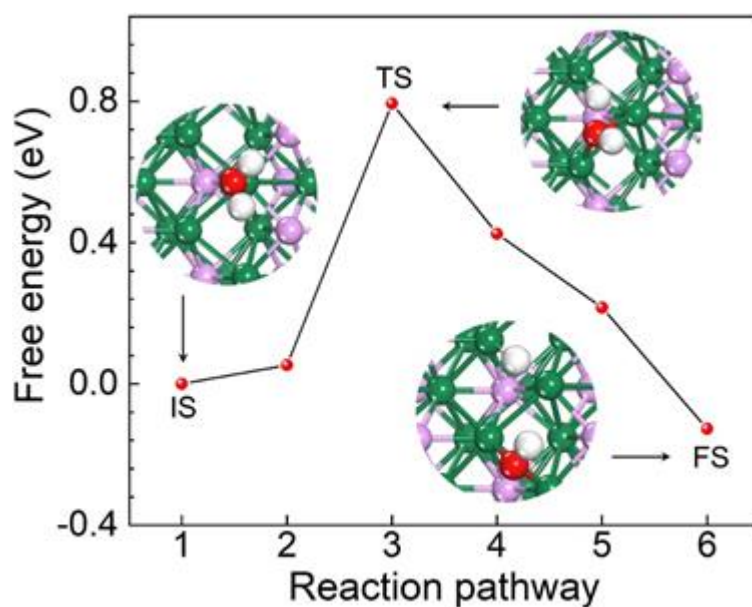

**Figure S20** The energy barrier and reaction pathway of water dissociation on Ni<sub>2</sub>P, including the corresponding configurations of IS, TS and FS.

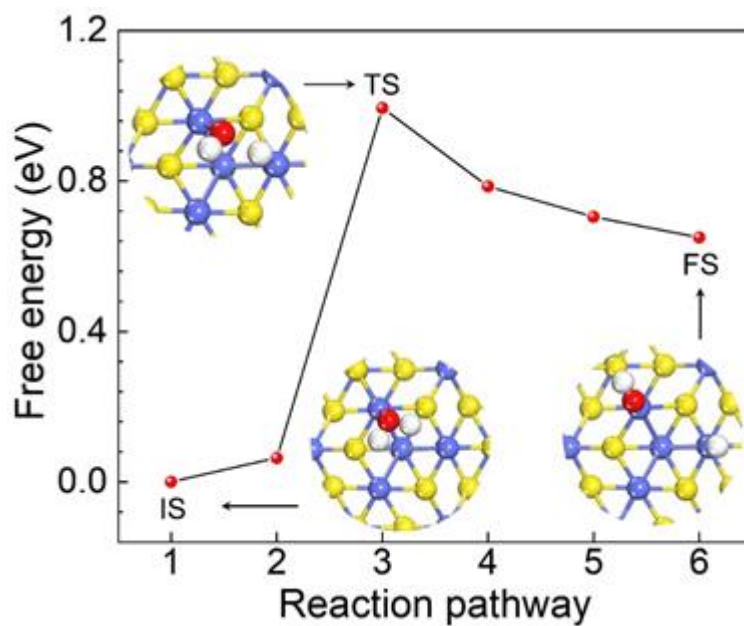

**Figure S21** The energy barrier and reaction pathway of water dissociation on  $\text{Co}_9\text{S}_8$ , including the corresponding configurations of IS, TS and FS.

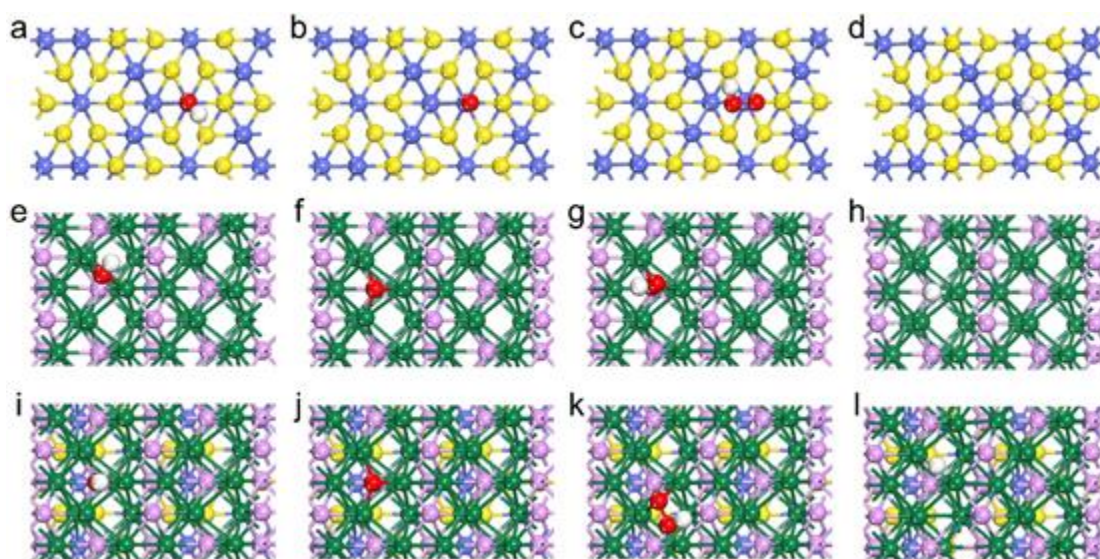

**Figure S22** Top views of  $\ast\text{OH}$ ,  $\ast\text{O}$ ,  $\ast\text{OOH}$  and  $\ast\text{H}$  on (a-d)  $\text{Co}_9\text{S}_8$ , (e-h)  $\text{Ni}_2\text{P}$  and (i-l)  $\text{Ni}_2\text{P}@ \text{Co}_9\text{S}_8$ .



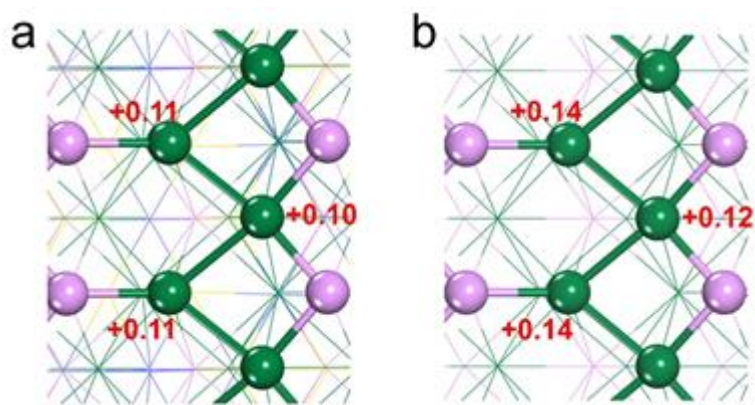

**Figure S23** Bader charge analyses of (a)  $\text{Ni}_2\text{P}@\text{Co}_9\text{S}_8$  and (b)  $\text{Ni}_2\text{P}$  including the Bader charge values of surface active Ni sites.

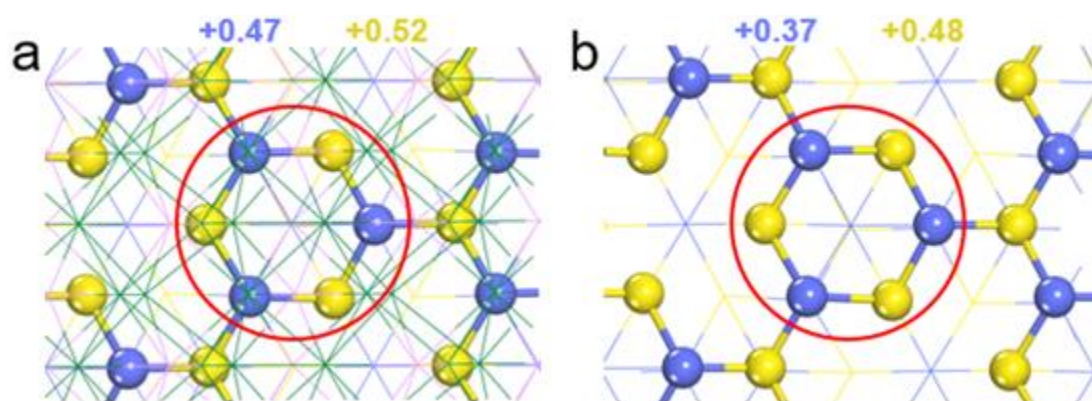

**Figure S24** Bader charge analysis of topmost Co and S atoms in (a)  $\text{Ni}_2\text{P}@\text{Co}_9\text{S}_8$  and (b)  $\text{Co}_9\text{S}_8$ . Target Co and S atoms are shown by red circles, and blue and yellow numbers are the average Bader charge values of three target Co and S atoms, respectively.

**Table S1** Calculated double layer capacitance and corresponding RF values (HER).

| Catalyst                                         | $C_{dl}$ (mF cm <sup>-2</sup> ) | RF   |
|--------------------------------------------------|---------------------------------|------|
| Ni <sub>2</sub> P@Co <sub>9</sub> S <sub>8</sub> | 91                              | 2275 |
| Co <sub>9</sub> S <sub>8</sub>                   | 54                              | 1350 |
| Ni <sub>2</sub> P                                | 55                              | 1375 |

**Table S2**  $R_{ct}$  values of Ni<sub>2</sub>P@Co<sub>9</sub>S<sub>8</sub>, Co<sub>9</sub>S<sub>8</sub> and Ni<sub>2</sub>P for HER.

| Catalyst                                         | $R_{ct}$ ( $\Omega$ ) |
|--------------------------------------------------|-----------------------|
| Ni <sub>2</sub> P@Co <sub>9</sub> S <sub>8</sub> | 2.79                  |
| Co <sub>9</sub> S <sub>8</sub>                   | 3.52                  |
| Ni <sub>2</sub> P                                | 3.85                  |

**Table S3** Calculated double layer capacitance and corresponding RF values (OER).

| Catalyst                                         | $C_{dl}$ (mF cm <sup>-2</sup> ) | RF   |
|--------------------------------------------------|---------------------------------|------|
| Ni <sub>2</sub> P@Co <sub>9</sub> S <sub>8</sub> | 50                              | 1250 |
| Co <sub>9</sub> S <sub>8</sub>                   | 28                              | 700  |
| Ni <sub>2</sub> P                                | 31                              | 775  |

**Table S4**  $R_{ct}$  values of Ni<sub>2</sub>P@Co<sub>9</sub>S<sub>8</sub>, Co<sub>9</sub>S<sub>8</sub> and Ni<sub>2</sub>P for OER.

| Catalyst                                         | $R_{ct}$ ( $\Omega$ ) |
|--------------------------------------------------|-----------------------|
| Ni <sub>2</sub> P@Co <sub>9</sub> S <sub>8</sub> | 2.51                  |
| Co <sub>9</sub> S <sub>8</sub>                   | 3.06                  |
| Ni <sub>2</sub> P                                | 2.76                  |



**Table S5** Comparison of overpotentials at 100 mA cm<sup>-2</sup> and Tafel slopes of different heterogeneous electrocatalysts recently reported for HER in 1.0 M KOH solution

| Catalyst                                                | Tafel<br>(mV dec <sup>-1</sup> ) | $\eta$ (mV) @ 100<br>mA cm <sup>-2</sup> | Reference                                                   |
|---------------------------------------------------------|----------------------------------|------------------------------------------|-------------------------------------------------------------|
| Ni <sub>2</sub> P@Co <sub>9</sub> S <sub>8</sub>        | 70                               | 188                                      | This work                                                   |
| c-NiP <sub>2</sub> /m-NiP <sub>2</sub>                  | 67                               | 200                                      | <i>Angew. Chem. Int. Ed.</i><br><b>2021</b> , 60, 259       |
| Ni <sub>2</sub> P/MoS <sub>2</sub>                      | 60.2                             | 260                                      | <i>Adv. Funct. Mater.</i><br><b>2019</b> , 29, 1809151      |
| ZnP@Ni <sub>2</sub> P-NiSe <sub>2</sub>                 | 82                               | 214                                      | <i>Adv. Funct. Mater.</i><br><b>2022</b> , 32, 2113224      |
| Ni <sub>5</sub> P <sub>4</sub> -Ni <sub>2</sub> P NS    | 79.1                             | 200                                      | <i>Angew. Chem. Int. Ed.</i><br><b>2015</b> , 54, 8188-8192 |
| 1T <sub>0.81</sub> -MoS <sub>2</sub> @Ni <sub>2</sub> P | 79                               | 292                                      | <i>Nat. Commun.</i> <b>2021</b> ,<br>12, 5260               |
| NiCu@C                                                  | 95                               | 247                                      | <i>J. Am. Chem. Soc.</i><br><b>2018</b> , 140, 610-617      |
| Ni <sub>5</sub> Co <sub>3</sub> Mo-OH                   | 59                               | 250                                      | <i>ACS Energy Lett.</i><br><b>2019</b> , 4, 952-959         |
| Ni -ZIF/NiB                                             | 101                              | 280                                      | <i>Adv. Energy Mater.</i><br><b>2020</b> , 10, 1902714      |
| Mo-Co <sub>9</sub> S <sub>8</sub> @C                    | 68                               | 320                                      | <i>Adv. Energy Mater.</i><br><b>2020</b> , 10, 1903137      |
| PBA@Co(OH) <sub>2</sub>                                 | 100                              | 260                                      | <i>Adv. Energy Mater.</i><br><b>2019</b> , 9, 1802939       |
| NiFeSe                                                  | 49                               | 230                                      | <i>Adv. Energy Mater.</i><br><b>2019</b> , 9, 1802983       |
| Ni-Mo-N/CFC                                             | 70                               | 250                                      | <i>Nat. Commun.</i> <b>2019</b> ,<br>10, 5335               |
| Co-Ni <sub>3</sub> N/CC                                 | 185                              | ~256                                     | <i>Adv. Mater.</i> <b>2018</b> , 30,<br>e1705516            |
| FeNiP-NPHC                                              | 102                              | 182                                      | <i>Adv. Funct. Mater.</i><br><b>2022</b> , 32, 2205767      |
| Co <sub>0.42</sub> Fe <sub>0.58</sub> P@C               | 66.6                             | 181(10)                                  | <i>Adv. Energy Mater.</i><br><b>2022</b> , 12, 2202394      |

**Table S6** Comparison of overpotentials at 100 mA cm<sup>-2</sup> and Tafel slopes of different heterogeneous electrocatalysts recently reported for OER in 1.0 M KOH solution

| Catalyst                                                                             | Tafel<br>(mV dec <sup>-1</sup> ) | $\eta$ (mV) @ 100<br>mA cm <sup>-2</sup> | Reference                                                        |
|--------------------------------------------------------------------------------------|----------------------------------|------------------------------------------|------------------------------------------------------------------|
| Ni <sub>2</sub> P@Co <sub>9</sub> S <sub>8</sub>                                     | 57                               | 253                                      | This work                                                        |
| MoS <sub>2</sub> /Co <sub>9</sub> S <sub>8</sub> /Ni <sub>3</sub> S <sub>2</sub> /Ni | 58                               | 420                                      | <i>J. Am. Chem. Soc.</i> <b>2019</b> , <i>141</i> , 10417-10430  |
| Co <sub>3</sub> O <sub>4</sub> -NP/N-rGO                                             | 62                               | 380                                      | <i>Adv. Energy Mater.</i> <b>2018</b> <i>8</i> , 1702222         |
| CoFe <sub>2</sub> O <sub>4</sub> @N-CNFs                                             | 80                               | 349                                      | <i>Adv. Sci.</i> <b>2017</b> , <i>4</i> , 1700226                |
| CF/VGSs/MoS                                                                          | 113                              | 450                                      | <i>Nat. Commun.</i> <b>2021</b> , <i>12</i> , 1380               |
| Co-MoS <sub>2</sub> /BCCF-21                                                         | 85                               | 370                                      | <i>Adv. Mater.</i> <b>2018</b> , <i>30</i> , 1801450             |
| Ni <sub>2</sub> P-NiSe <sub>2</sub>                                                  | 71                               | 326                                      | <i>Adv. Funct. Mater.</i> <b>2022</b> , <i>32</i> , 2113224      |
| Fe-Ni <sub>2</sub> P@Cu <sub>x</sub> S                                               | 59                               | 390                                      | <i>ACS Energy Lett.</i> <b>2019</b> , <i>4</i> , 952-959         |
| S-(Ni,Fe)OOH                                                                         | 48.9                             | 281                                      | <i>Energy Environ. Sci.</i> <b>2020</b> , <i>13</i> , 3439-3446  |
| W <sub>0.5</sub> Co <sub>0.4</sub> Fe <sub>0.1</sub> /NF                             | 310                              | 42                                       | <i>Angew. Chem. Int. Ed.</i> <b>2017</b> , <i>56</i> , 4502-4506 |
| 2D/1D FeNi<br>LDH/MOF                                                                | 37.1                             | 272                                      | <i>Adv. Funct. Mater.</i> <b>2021</b> , <i>31</i> , 2103318      |
| Fe <sub>2</sub> Ni-BPTC/CC                                                           | 42                               | 365                                      | <i>Angew. Chem. Int. Ed.</i> <b>2018</b> , <i>57</i> , 9660      |
| (CrMnFeCoNi) <sub>S<sub>x</sub></sub>                                                | 66                               | 295                                      | <i>Adv. Energy Mater.</i> <b>2021</b> , <i>11</i> , 2002887      |
| CoMoNiS-NF-31                                                                        | 53                               | 260                                      | <i>J. Am. Chem. Soc.</i> <b>2019</b> , <i>141</i> , 10417-10430. |
| MoO <sub>x</sub> /Ni <sub>3</sub> S <sub>2</sub>                                     | 72                               | 310                                      | <i>Adv. Funct. Mater.</i> <b>2016</b> , <i>26</i> , 4839.        |
| (Fe,Co)OOH/MI                                                                        | 73                               | 290                                      | <i>Adv. Mater.</i> <b>2022</b> , <i>34</i> , 2200270             |
| CoNiFeCu                                                                             | 43.5                             | 292                                      | <i>Adv. Mater.</i> <b>2022</b> , <i>34</i> , 2109108             |
| MoS <sub>2</sub> /NiFe<br>LDH  MoNiFe                                                | 23                               | 290                                      | <i>Nat. Commun.</i> <b>2022</b> , <i>13</i> , 2191               |

|                |      |         |                                                      |
|----------------|------|---------|------------------------------------------------------|
| CoNiRu-NT      | 67   | 335     | <i>Adv. Mater.</i> <b>2022</b> , <i>34</i> , 2107488 |
| FeCoNiMnRu/CNF | 61.3 | 308     | <i>Nat. Commun.</i> <b>2022</b> , <i>13</i> , 2662   |
| Mn-NG          | 55   | 337(10) | <i>Nat. Catal.</i> <b>2018</b> , <i>1</i> , 870-877  |
| Ni-NHGF        | 61   | 331(10) | <i>Nat. Catal.</i> <b>2018</b> , <i>1</i> , 63-72    |

**Table S7** Comparison of cell voltages at 10 and 100 mA cm<sup>-2</sup> and stabilities of different bifunctional non-noble metal electrocatalysts recently reported for overall water splitting in 1.0 M KOH solution

| Catalyst                                         | Cell voltage at 10 mA cm <sup>-2</sup> (V) | Cell voltage at 100 mA cm <sup>-2</sup> (V) | Reference                                                         |
|--------------------------------------------------|--------------------------------------------|---------------------------------------------|-------------------------------------------------------------------|
| Ni <sub>2</sub> P@Co <sub>9</sub> S <sub>8</sub> | 1.46                                       | 1.66                                        | This work                                                         |
| FeCoNi/CC                                        | 1.55                                       | 2.00                                        | <i>Adv. Energy Mater.</i> <b>2019</b> , <i>9</i> , 1901312        |
| Co <sub>3</sub> S <sub>4</sub> /MOF              | 1.55                                       | 1.90                                        | <i>Adv. Mater.</i> <b>2019</b> , <i>31</i> , 1806672              |
| Ni/γ-Fe <sub>2</sub> O <sub>3</sub>              | 1.47                                       | 1.77                                        | <i>Nat. Commun.</i> <b>2019</b> , <i>10</i> , 5599                |
| CoFeZrO <sub>x</sub>                             | 1.63                                       | 1.78                                        | <i>Adv. Mater.</i> <b>2019</b> , <i>31</i> , 1901439              |
| Ni-ZIF/NiB                                       | 1.54                                       | 1.77                                        | <i>Adv. Energy Mater.</i> <b>2020</b> , <i>10</i> , 1902714       |
| PBA@Co(OH) <sub>2</sub>                          | 1.65                                       | 1.99                                        | <i>Adv. Energy Mater.</i> <b>2019</b> , <i>9</i> , 1802939        |
| Cr/FeNi-P                                        | 1.54                                       | 1.70                                        | <i>Adv. Mater.</i> <b>2019</b> , <i>31</i> , 1900178              |
| CoMoNiS                                          | 1.54                                       | 2.09                                        | <i>J. Am. Chem. Soc.</i> <b>2019</b> , <i>141</i> , 10417-10430   |
| Au/Ni <sub>3</sub> S <sub>2</sub> /NF            | 1.52                                       | 1.82*                                       | <i>Appl. Catal. B: Environ.</i> <b>2022</b> , <i>304</i> , 120935 |
| MH-TMO                                           | 1.49                                       | 1.72                                        | <i>Adv. Energy Mater.</i> <b>2022</b> , <i>12</i> , 2200067       |
| BPIr-be                                          | 1.57                                       | 1.78                                        | <i>Adv. Mater.</i> <b>2021</b> , <i>33</i> , 2104638              |
| O-CMMOFs-NF                                      | 1.47                                       | 1.85                                        | <i>Appl. Catal. B: Environ.</i> <b>2022</b> , <i>307</i> , 121151 |
| Ni-MoO <sub>2</sub> /NF-IH                       | 1.50                                       | 1.72                                        | <i>Adv. Funct. Mater.</i> <b>2021</b> , <i>31</i> , 2009580.      |
| CoFeO@BP                                         | 1.58                                       | 1.78                                        | <i>Angew. Chem. Int. Ed.</i> <b>2020</b> , <i>59</i> , 21106.     |
| MoS <sub>2</sub> /NiFe LDH  MoNiFe               | 1.61                                       | 1.73                                        | <i>Nat. Commun.</i> <b>2022</b> , <i>13</i> , 2191                |

---

|            |      |      |                                                        |
|------------|------|------|--------------------------------------------------------|
| CoFeP@C    | 1.55 | 1.78 | <i>Adv. Energy Mater.</i><br><b>2022</b> , 12, 2202394 |
| FeCoNi MOF | 1.60 | 1.90 | <i>J. Am. Chem. Soc.</i><br><b>2022</b> , 144, 3411    |

---

**Table S8** Comparison of the overpotentials at 200 mA cm<sup>-2</sup> toward the HER in 1 M KOH of the Ni<sub>2</sub>P@Co<sub>9</sub>S<sub>8</sub> with other reported high-performance bifunctional catalysts.

| Catalyst                                         | $\eta$ (mV) @ 200 mA<br>cm <sup>-2</sup> | Reference                                                   |
|--------------------------------------------------|------------------------------------------|-------------------------------------------------------------|
| Ni <sub>2</sub> P@Co <sub>9</sub> S <sub>8</sub> | 204                                      | This work                                                   |
| CoNC@Co <sub>2</sub> N/CPs                       | 330                                      | <i>Adv. Energy Mater.</i> <b>2020</b> , <i>10</i> , 2002214 |
| Ni-N <sub>3</sub>                                | 345                                      | <i>Adv. Mater.</i> <b>2020</b> , <i>33</i> , 2003846        |
| Cu <sub>1</sub> Ni <sub>2</sub> -N               | 255                                      | <i>Adv. Energy Mater.</i> <b>2019</b> , <i>9</i> , 1900390  |
| Ni <sub>5</sub> Co <sub>3</sub> Mo-OH            | 290                                      | <i>ACS Energy Lett.</i> <b>2019</b> , <i>4</i> , 952-959    |
| Cu <sub>3</sub> N                                | 335                                      | <i>ACS Energy Lett.</i> <b>2019</b> , <i>4</i> , 747-754    |
| NiMoN/CFC                                        | 400                                      | <i>Nat. Commun.</i> <b>2019</b> , <i>10</i> , 5335          |
| FeNiS/Ni                                         | 300                                      | <i>Adv. Energy Mater.</i> <b>2020</b> , 2001963             |
| NiFeP/graphene                                   | 290                                      | <i>Adv. Mater.</i> <b>2020</b> , <i>32</i> , 1908201        |
| NiFeSe                                           | 325                                      | <i>Adv. Energy Mater.</i> <b>2019</b> , <i>9</i> , 1802983  |

**Table S9** Comparison of the overpotentials at 200 mA cm<sup>-2</sup> toward the OER in 1 M KOH of the Ni<sub>2</sub>P@Co<sub>9</sub>S<sub>8</sub> with other reported high-performance bifunctional catalysts.

| Catalyst                                                                         | $\eta$ (mV) @ 200 mA<br>cm <sup>-2</sup> | Reference                                                       |
|----------------------------------------------------------------------------------|------------------------------------------|-----------------------------------------------------------------|
| Ni <sub>2</sub> P@Co <sub>9</sub> S <sub>8</sub>                                 | 276                                      | This work                                                       |
| NiCo LDH/NiCoS                                                                   | 378                                      | <i>Nano Res.</i> <b>2022</b> , <i>15</i> , 4986-4995            |
| CoOOH                                                                            | 340                                      | <i>J. Mater. Chem. A</i> <b>2019</b> , <i>7</i> , 7777-7783     |
| Co <sub>2</sub> P-Co <sub>3</sub> O <sub>4</sub>                                 | 405                                      | <i>Adv. Energy Mater.</i> <b>2018</b> , <i>8</i> , 1802445      |
| Ni/MoN/rNS)                                                                      | 533                                      | <i>Adv. Sci.</i> <b>2022</b> , <i>9</i> , 2105869               |
| Ni <sub>x</sub> Co <sub>3-x</sub> S <sub>4</sub> /Ni <sub>3</sub> S <sub>2</sub> | 318                                      | <i>Nano Energy</i> <b>2017</b> , <i>35</i> , 161-170            |
| MoO <sub>x</sub> /Ni <sub>3</sub> S <sub>2</sub>                                 | 312                                      | <i>Adv. Funct. Mater.</i> <b>2016</b> , <i>26</i> , 4839-4847   |
| EG/Co <sub>0.85</sub> Se/NiFe-LDH                                                | 290*                                     | <i>Energy Environ. Sci.</i> <b>2016</b> , <i>9</i> , 478-483    |
| FeCoNiCuMn HEA/CNF                                                               | 386                                      | <i>Energy Environ. Sci.</i> <b>2023</b> , <i>16</i> , 619-628   |
| MX@MOF-Co <sub>2</sub> P                                                         | 407                                      | <i>J. Mater. Sci. Technol.</i> <b>2023</b> , <i>145</i> , 74-82 |
| Ni/MoN/rNS                                                                       | 533                                      | <i>Adv. Sci.</i> <b>2022</b> , <i>9</i> , 2105869               |
| Co/CoO/Co(OH) <sub>2</sub>                                                       | 360*                                     | <i>Appl. Catal. B</i> <b>2021</b> , <i>292</i> , 120063         |
| Ir-1/Ni <sub>1.6</sub> Mn <sub>1.4</sub> O <sub>4</sub>                          | 350                                      | <i>Adv. Sci.</i> <b>2022</b> , <i>9</i> , 2200529               |

\*The data were calculated according to the curves given in the literature

**Table S10** Comparison of the overpotentials at 200 mA cm<sup>-2</sup> toward the overall water splitting in 1 M KOH of the Ni<sub>2</sub>P@Co<sub>9</sub>S<sub>8</sub> with other reported high-performance bifunctional catalysts

| Catalyst                                         | Cell voltage at 200<br>mA cm <sup>-2</sup> (V) | Reference                                                |
|--------------------------------------------------|------------------------------------------------|----------------------------------------------------------|
| Ni <sub>2</sub> P@Co <sub>9</sub> S <sub>8</sub> | 1.76                                           | This work                                                |
| Co <sub>3</sub> Se <sub>4</sub> /CF              | 2.11                                           | <i>Adv. Energy Mater.</i> , <b>2017</b> ,<br>7, 1602579  |
| CoP/NCNHP                                        | 1.97                                           | <i>J. Am. Chem. Soc.</i> <b>2018</b> ,<br>140, 2610-2618 |
| NiCoP@NF-100                                     | 1.87                                           | <i>J. Energy Chem.</i> <b>2020</b> , 50,<br>395-401      |
| CoPO/NF                                          | 1.98                                           | <i>Adv. Funct. Mater.</i> <b>2018</b> ,<br>28, 1706120   |
| NC@CuCo <sub>2</sub> N <sub>x</sub> /CF          | 1.93                                           | <i>Adv. Funct. Mater.</i> <b>2017</b> ,<br>27, 1704169   |
| Ni-P/NF                                          | 2.17*                                          | <i>J. Mater. Chem. A.</i> <b>2016</b> , 4,<br>5639-5646  |
| Ni-P/CP                                          | 3.3*                                           | <i>Adv. Funct. Mater.</i> <b>2016</b> ,<br>26, 4067-4077 |
| Cu <sub>3</sub> N                                | 1.8                                            | <i>ACS Energy Lett.</i> <b>2019</b> , 4,<br>747-754      |
| FeNiS/Ni                                         | 1.95                                           | <i>Adv. Energy Mater.</i> <b>2020</b> ,<br>2001963.      |
| FeCoNi/CC                                        | 2.13                                           | <i>Adv. Energy Mater.</i> <b>2019</b> ,<br>9, 1901312.   |
| NiFeP/graphene                                   | 1.90                                           | <i>Adv. Mater.</i> <b>2020</b> , 32,<br>1908201          |



---

|                          |      |                                                                  |
|--------------------------|------|------------------------------------------------------------------|
| CoNC                     | 1.91 | <i>Energy Environ. Sci.</i> <b>2020</b> ,<br><i>13</i> , 545-553 |
| FeCo/Co <sub>2</sub> P@C | 2.1  | <i>Adv. Energy Mater.</i> <b>2020</b> ,<br><i>10</i> , 1903854.  |
| CoNSC                    | 1.78 | <i>Adv. Energy Mater.</i> <b>2020</b> ,<br><i>10</i> , 2002896   |
| NiCoP/NF                 | 1.98 | <i>Nano Lett.</i> <b>2016</b> , <i>16</i> , 7718-<br>7725        |

---

\*The data were calculated according to the curves given in the literature
